# Supplementary material for: Anti-Candidal Activity and Functional Mapping of Recombinant and Synthetic Neosartorya fischeri Antifungal Protein 2 (NFAP2)
Source: PubMed Central journal article supplement (PMC5845869; doi:10.3389/fmicb.2018.00393), 2018-03-07
Supplement: Presentation1.pdf [file Presentation1.pdf]

## *Supplementary Material*

### **Anti-candidal activity and functional mapping of recombinant and synthetic *Neosartorya fischeri* antifungal protein 2 (NFAP2)**

**Liliána Tóth, Györgyi Váradi, Attila Borics, Gyula Batta, Zoltán Kele, Ákos Vendrinszky, Roberta Tóth, Hargita Ficze, Gábor K. Tóth, Csaba Vágvölgyi, Florentine Marx, László Galgóczy\***

\* **Correspondence:** László Galgóczy: [galgoczi@gmail.com](mailto:galgoczi@gmail.com)

#### **1 Supplementary Figures and Tables**

##### **1.1 Supplementary Figures**

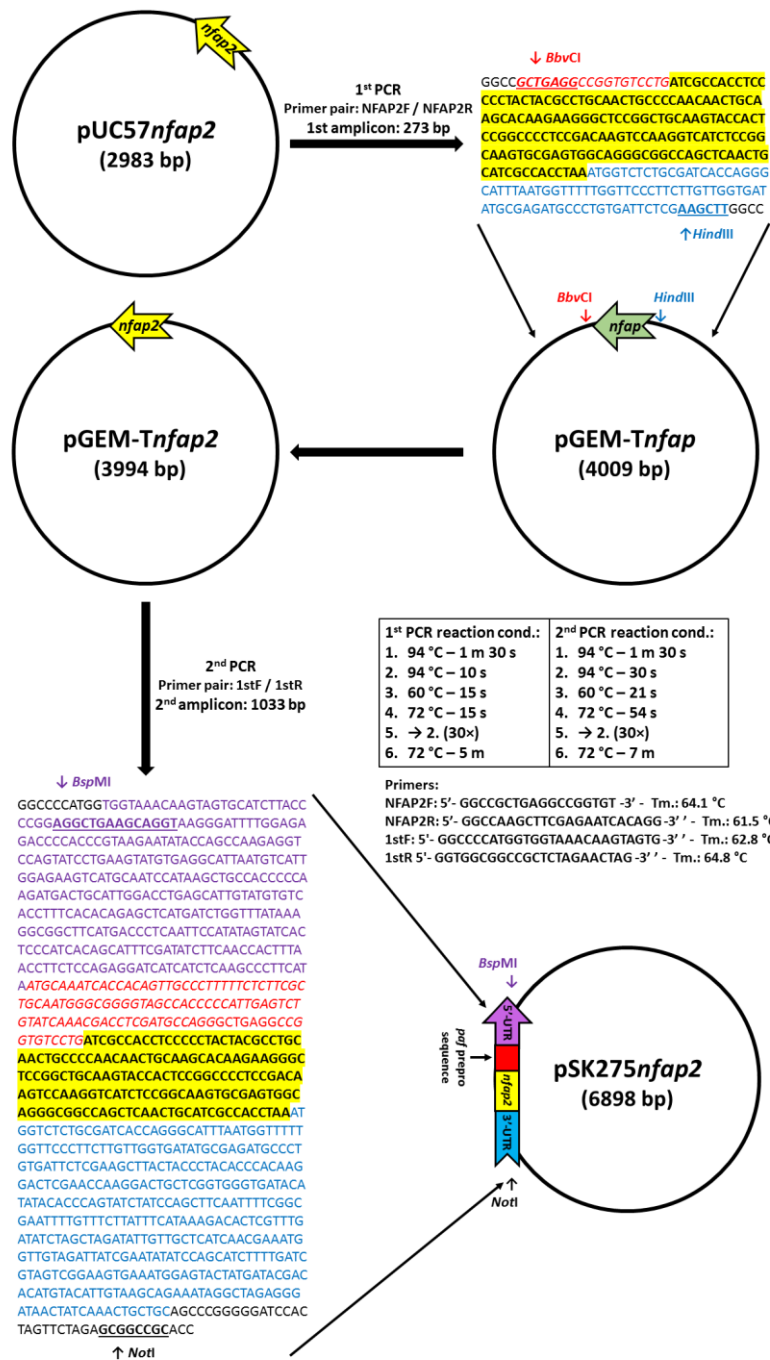

**Supplementary Figure 1.** Schematic representation of the cloning strategy of the NFAP2 expression vector pSK275nfap2. The mature NFAP2 coding cDNA is highlighted with yellow background, the *pac* prepro sequence indicated red letters, 5'- and 3'-UTR are shown by lilac and blue letters. The restriction sites are underlined and shown with vertical bold arrows.

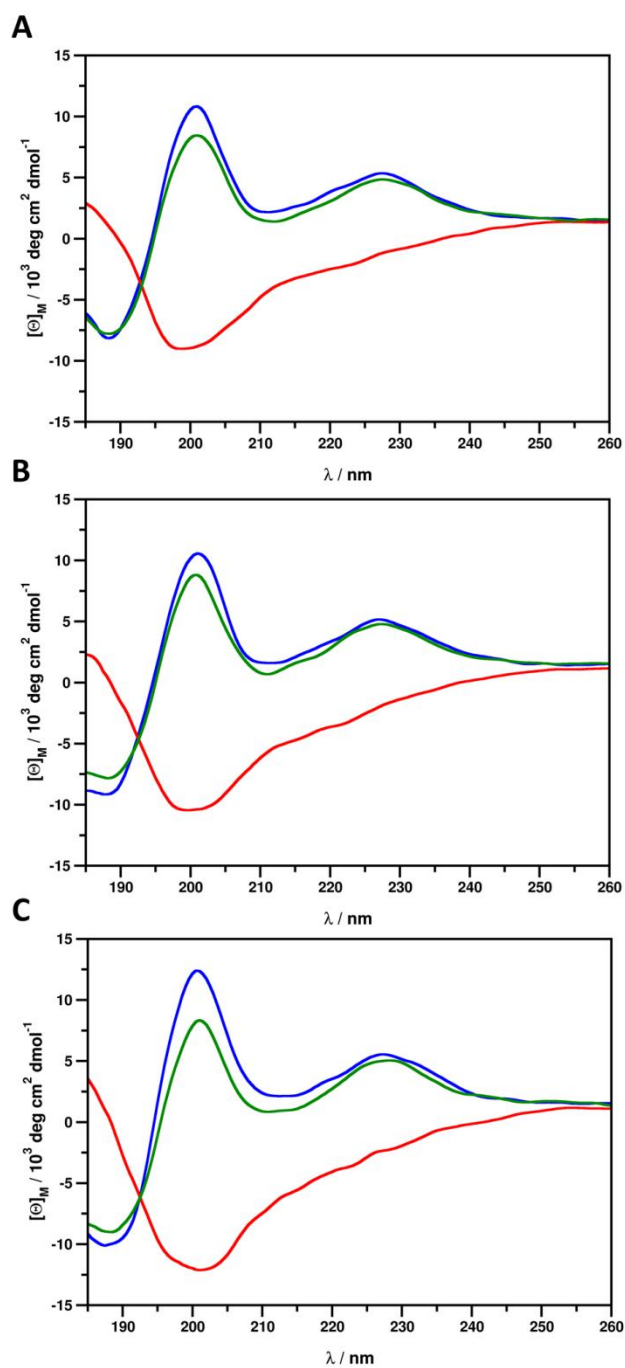

**Supplementary Figure 2.** ECD spectra of (A) nNFAP2, (B) rNFAP2 and (C) sNFAP2 recorded at 25 °C (blue), 95 °C (red), and after cooling and 5 minutes of equilibration at 25 °C (green). nNFAP2: native NFAP2 produced by *N. fischeri* NRRL 181, rNFAP2: recombinant NFAP2 produced by *P. chrysogenum nfap2*, sNFAP2: synthetic NFAP2.

A

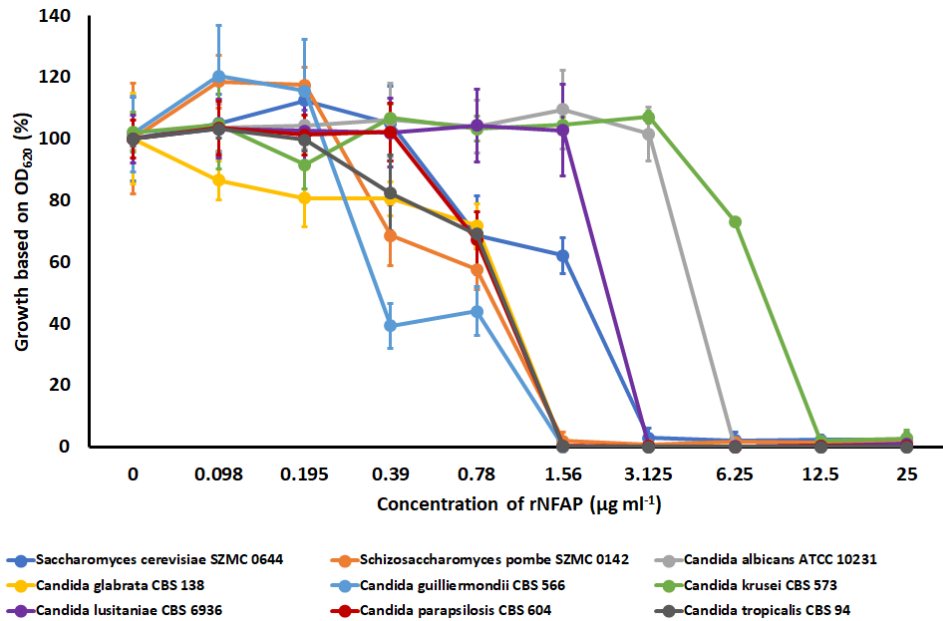

B

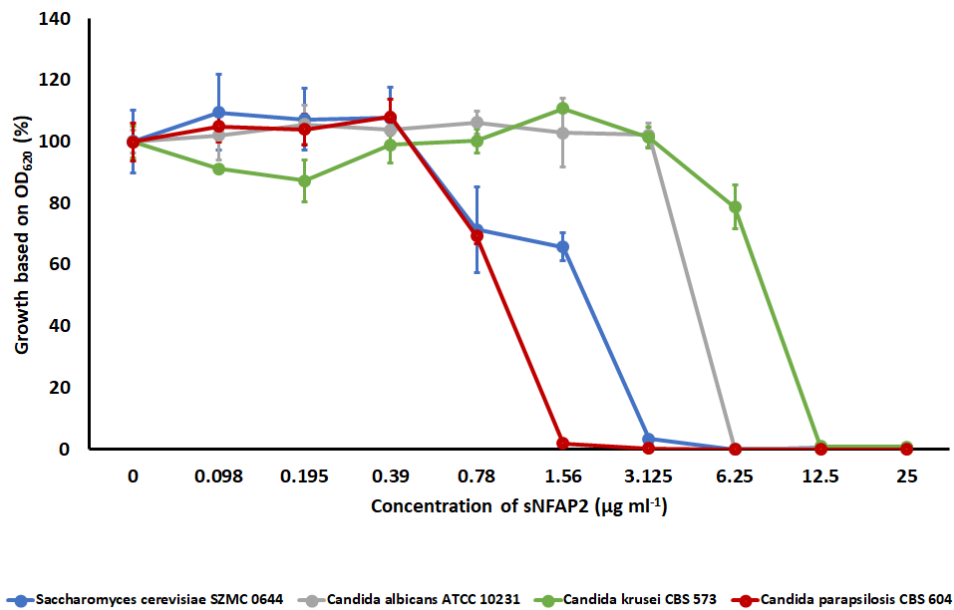

**Supplementary Figure 3.** Growth inhibition potential of (A) rNFAP2 and (B) sNFAP2 at different concentrations in LCM after incubation for 48 hours at 30 °C. The untreated control was defined as 100% of growth. rNFAP2: recombinant NFAP2 produced by *P. chrysogenum nfap2*, sNFAP2: synthetic NFAP2.

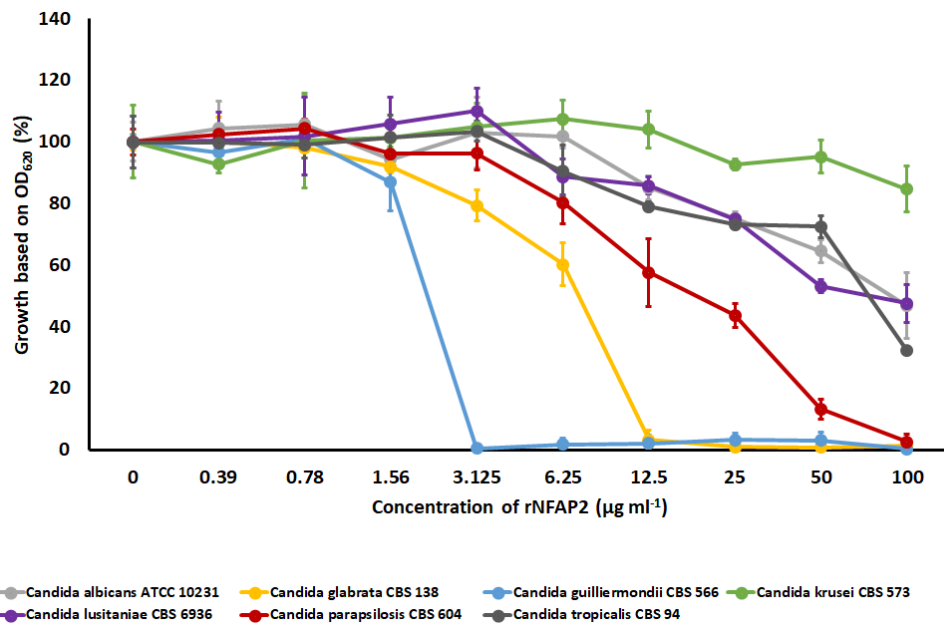

**Supplementary Figure 4.** Growth inhibition potential of rNFAP2 at different concentrations in RPMI 1640 medium after incubation for 48 hours at 35 °C. rNFAP2: recombinant *Neosartorya fischeri* antifungal protein 2. The untreated control was defined as 100% of growth. rNFAP2: recombinant NFAP2 produced by *P. chrysogenum nfap2*.

A

| <i>Candida albicans</i> ATCC 10231 |            |            |            |            |             |             |
|------------------------------------|------------|------------|------------|------------|-------------|-------------|
| rNFAP2 / FLC                       | 100        | 50         | 25         | 12.5       | 6.25        | 0           |
| 1                                  | 0.25±0.36  | 0.59±0.83  | 0.67±0.95  | 0.34±0.47  | 0.84±1.18   | 1.17±0.95   |
| 0.5                                | 0.42±0.59  | 1.68±0.71  | 1.01±1.42  | 1.51±1.18  | 3.43±2.72   | 9.11±0.35   |
| 0.25                               | 1.51±1.18  | 3.43±1.07  | 4.62±1.55  | 9.46±1.30  | 10.55±1.42  | 21.52±8.17  |
| 0.125                              | 20.85±4.38 | 31.49±2.13 | 29.23±3.67 | 25.29±1.90 | 50.92±6.40  | 60.44±3.12  |
| 0.0625                             | 32.69±0.98 | 54.05±0.08 | 58.59±0.88 | 67.24±0.60 | 71.47±0.01  | 81.02±3.48  |
| 0                                  | 43.22±4.50 | 65.66±2.37 | 97.04±9.78 | 98.69±0.90 | 104.56±1.85 | 100.28±0.40 |

B

| <i>Candida krusei</i> CBS 573 |             |             |             |             |             |             |
|-------------------------------|-------------|-------------|-------------|-------------|-------------|-------------|
| rNFAP2 / FLC                  | 100         | 50          | 25          | 12.5        | 6.25        | 0           |
| 64                            | 0.65±0.61   | 1.85±0.15   | 1.09±0.00   | 1.09±0.31   | 1.74±0.31   | 0.54±0.46   |
| 32                            | 3.26±3.07   | 15.54±3.23  | 19.13±2.46  | 27.83±0.61  | 33.8±1.38   | 66.96±4.30  |
| 16                            | 51.09±2.46  | 45.48±2.83  | 52.5±0.15   | 59.67±2.31  | 67.04±1.41  | 89.24±2.00  |
| 8                             | 107.61±4.92 | 107.28±0.15 | 107.83±2.46 | 94.35±9.84  | 100.65±1.38 | 100.76±2.61 |
| 4                             | 105.96±4.18 | 107.07±0.15 | 101.41±1.38 | 105.54±3.54 | 104.78±1.23 | 97.17±5.23  |
| 0                             | 100±15.99   | 99.24±12.14 | 100.11±2.31 | 105.33±3.23 | 109.13±2.15 | 103.59±5.07 |

C

| <i>Candida parapsilosis</i> CBS 604 |           |           |            |             |             |             |
|-------------------------------------|-----------|-----------|------------|-------------|-------------|-------------|
| rNFAP2 / FLC                        | 100       | 50        | 25         | 12.5        | 6.25        | 0           |
| 8                                   | 4.35±1.02 | 1.67±0.71 | 3.99±0.51  | 2.54±0.51   | 2.90±1.02   | 3.73±0.05   |
| 4                                   | 3.93±0.58 | 5.43±0.51 | 3.26±0.51  | 4.05±0.42   | 2.87±1.63   | 7.9±1.02    |
| 2                                   | 2.54±2.56 | 5.8±2.05  | 2.9±1.02   | 2.54±1.54   | 3.78±1.24   | 27.17±7.69  |
| 1                                   | 5.8±2.05  | 6.16±1.54 | 2.90±1.03  | 2.54±2.56   | 6.23±1.64   | 73.41±2.77  |
| 0.5                                 | 5.07±1.02 | 8.48±1.74 | 14.86±4.61 | 24.86±1.33  | 78.26±3.07  | 107.17±1.33 |
| 0                                   | 2.54±1.54 | 6.52±2.05 | 35.29±2.36 | 103.48±3.48 | 101.52±0.10 | 104.78±6.76 |

**Supplementary Figure 5.** Growth percentages (%) of (A) *C. albicans* ATCC 10231, (B) *C. krusei* CBS 573, and (C) *C. parapsilosis* CBS 604 in combinatorial application of rNFAP2 and fluconazole in RPMI 1640 medium after incubation for 48 hours at 35 °C. (A,B,C) Red cells indicated the total growth inhibition (growth < 5%), orange cells the reduced growth ability (growth between 5% and 90%), green cells the total growth (growth between 90% and 100%). The untreated control was defined as 100% of growth. The effective concentration combinations below the individual MICs are framed with bold line. FLC: fluconazole, rNFAP2: recombinant NFAP2 produced by *P. chrysogenum nfap2*.

A

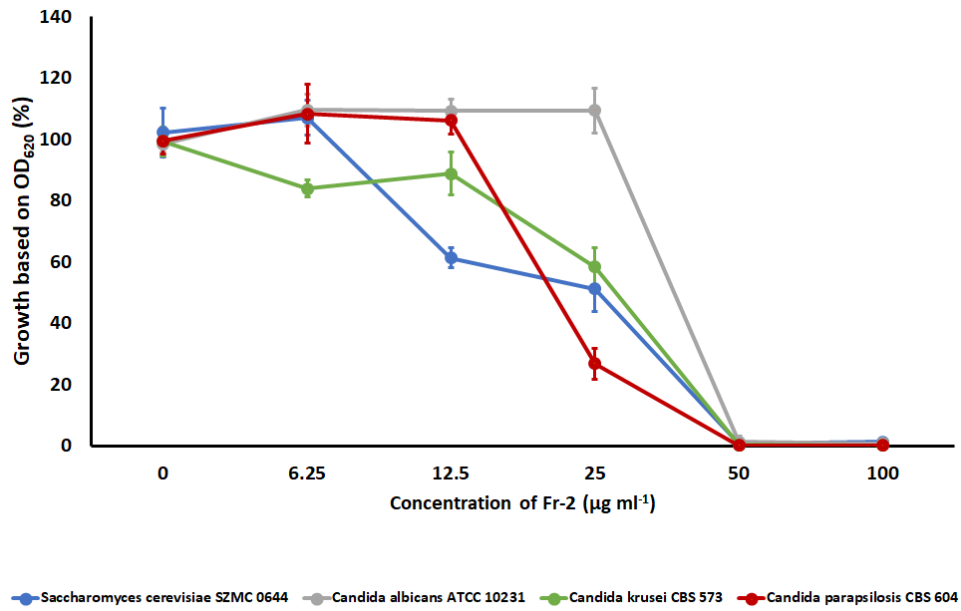

B

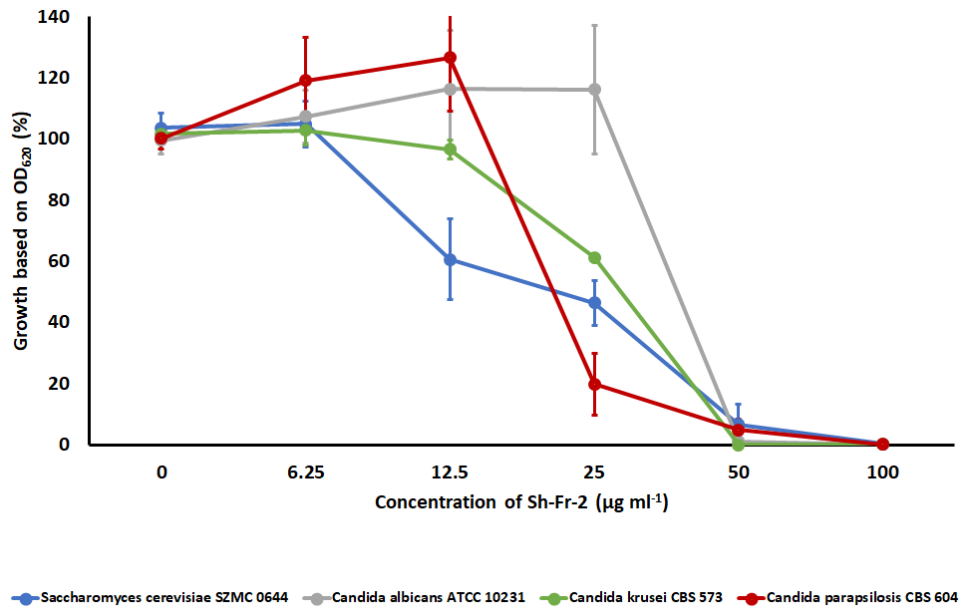

C

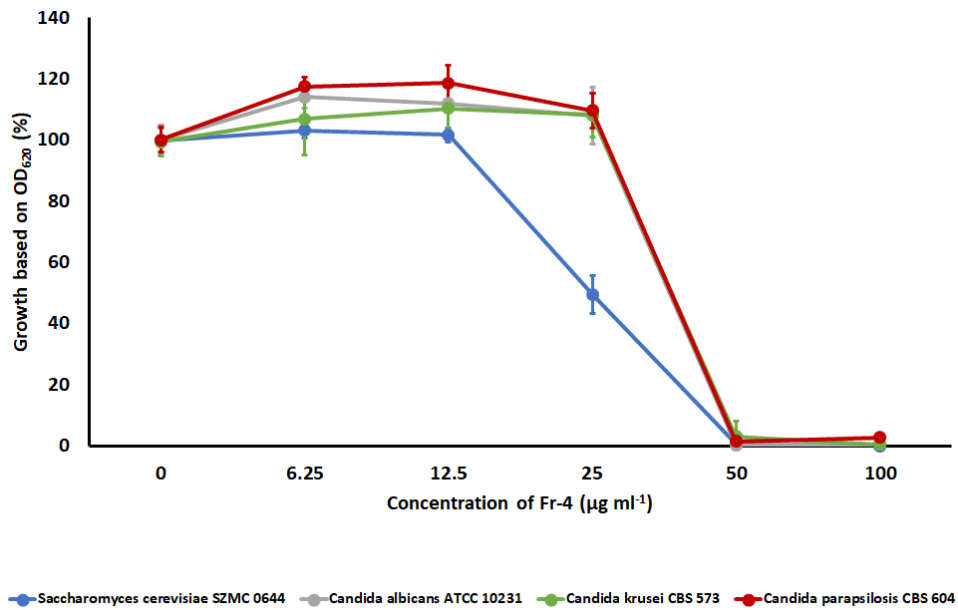

D

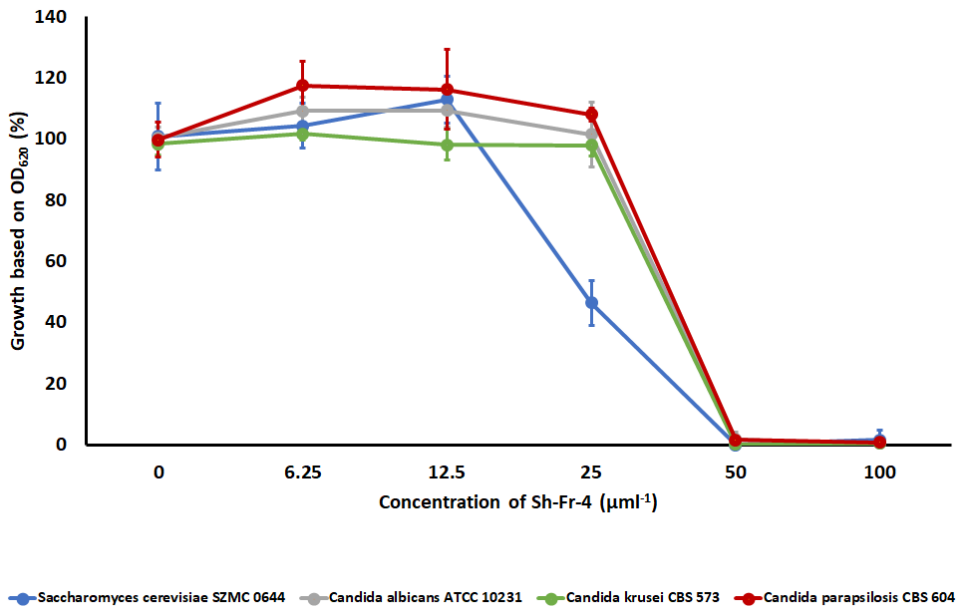

**Supplementary Figure 6.** Growth inhibition potential of (A) Fr-2, (C) Fr-4 of NFAP2 and their shuffled variants (B) Sh-Fr-2 and (D) Sh-Fr-4 at their different concentrations in LCM after incubation for 48 hours at 30 °C. Fr-2 and 4: synthetic peptide Fragment 2 and 4 of NFAP2 (Table 1); Sh-Fr-2 and 4: shuffle variants of synthetic peptide Fragments 2 and 4 of NFAP2 (Table 1).



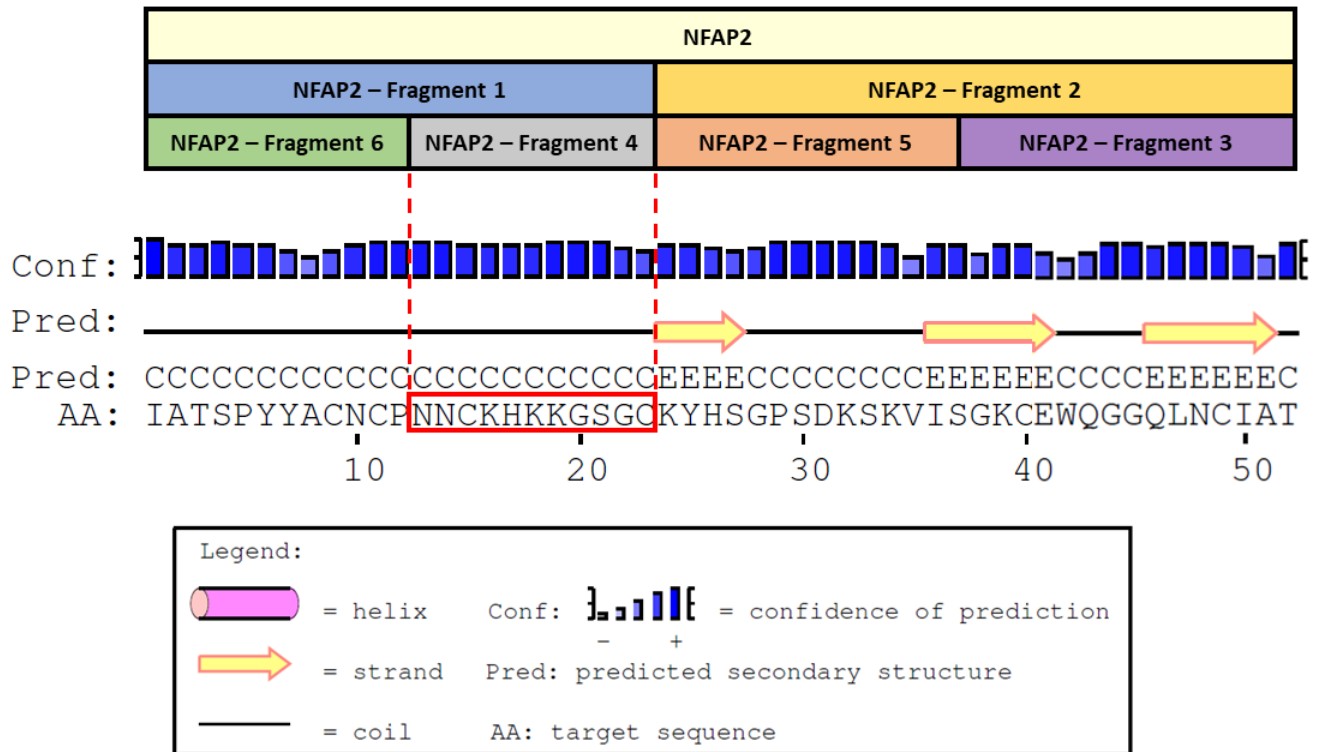

**Supplementary Figure 7.** Putative secondary structure of NFAP2 by the by PSIPRED (v3.3) Protein Analysis Workbench (Buchan et al., 2013). Fragment 4 (**Table 1**), the predicted functional active part of NFAP2 is indicated in red box.

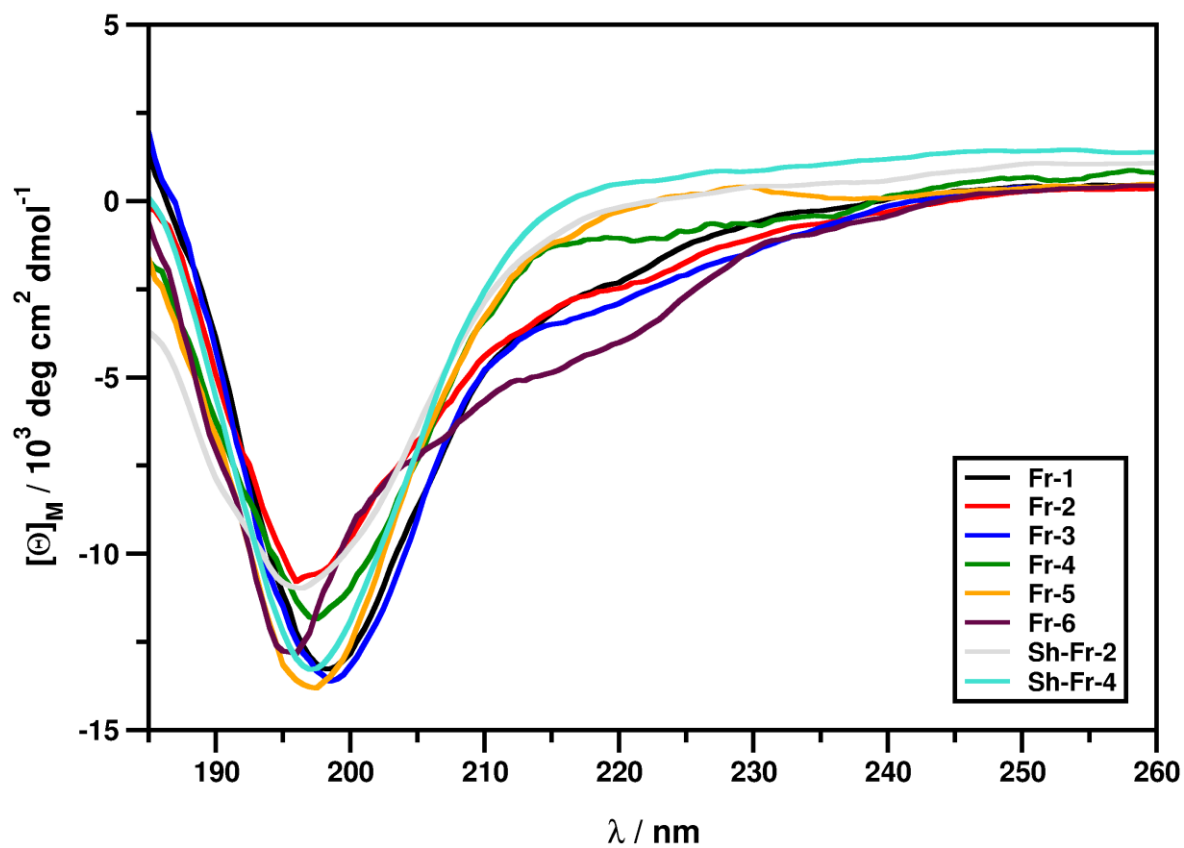

**Supplementary Figure 8.** ECD spectra of synthetic NFAP2 peptide fragments recorded at 25 °C. Fr-1 - 6: synthetic peptide Fragment 1 - 6 of NFAP2 (**Table 1**), Sh-Fr-2 and 4: shuffle variants of synthetic peptide Fragment 2 and 4 of NFAP2 (**Table 1**).
